# Supplementary material for: Different contribution of BRINP3 gene in chronic periodontitis and peri-implantitis: a cross-sectional study
Source: PubMed Central journal article supplement (PMC4367924; doi:10.1186/s12903-015-0018-6), 2015-03-11
Supplement: 12903_2015_18_MOESM1_ESM.pdf [file 12903_2015_18_MOESM1_ESM.pdf]

Additional File 1. Clinical findings and anamnesis data of the discovery sample.

| Parameters                       | Healthy<br>(n=93) | Diseased<br>(n=52) | Chronic<br>Periodontiti<br>s Only<br>(n=36) | Peri-<br>Implantitis<br>Only<br>(n=34) | <i>p-value</i>           |                                                  |                                              |                                               |                                                   |                                                                   |
|----------------------------------|-------------------|--------------------|---------------------------------------------|----------------------------------------|--------------------------|--------------------------------------------------|----------------------------------------------|-----------------------------------------------|---------------------------------------------------|-------------------------------------------------------------------|
|                                  | n (%)             | n (%)              | n (%)                                       | n (%)                                  | Healthy<br>X<br>Diseased | Healthy<br>X<br>Chronic<br>Periodontitis<br>Only | Healthy<br>X<br>Peri-<br>Implantitis<br>Only | Diseased<br>X<br>Peri-<br>Implantitis<br>Only | Diseased<br>X<br>Chronic<br>Periodontitis<br>Only | Chronic<br>Periodontitis<br>Only<br>X<br>Peri-Implantitis<br>Only |
| <b>General Medical Condition</b> |                   |                    |                                             |                                        |                          |                                                  |                                              |                                               |                                                   |                                                                   |
| Systemic disease                 | 24 (25.8)         | 15 (28.8)          | 18 (50)                                     | 6 (17.6)                               | 0.69                     | 0.008                                            | 0.33                                         | 0.23                                          | 0.04*                                             | 0.004                                                             |
| Diabetes                         | 1 (1)             | 4 (7.7)            | 1 (2.8)                                     | 1 (2.9)                                | 0.03*                    | 0.48                                             | 0.44                                         | 0.35                                          | 0.32                                              | 0.96                                                              |
| Rheumatoid diseases              | 3 (3.2)           | 2 (3.8)            | 4 (11)                                      | 1 (2.9)                                | 0.84                     | 0.07                                             | 0.93                                         | 0.82                                          | 0.18                                              | 0.18                                                              |
| Osteoporosis                     | 1 (1)             | 0                  | 1 (2.8)                                     | 0                                      | 0.45                     | 0.48                                             | 0.54                                         | -----                                         | 0.22                                              | 0.32                                                              |
| High blood pressure              | 12 (12.9)         | 7 (3.4)            | 8 (22)                                      | 3 (8.8)                                | 0.92                     | 0.18                                             | 0.52                                         | 0.51                                          | 0.28                                              | 0.12                                                              |
| Cardiovascular diseases          | 2 (2.1)           | 1 (1.9)            | 1 (2.8)                                     | 0                                      | 0.92                     | 0.92                                             | 0.38                                         | 0.41                                          | 0.79                                              | 0.32                                                              |
| Hypotireoidism                   | 4 (4.3)           | 1 (1.9)            | 2 (5.5)                                     | 1 (2.9)                                | 0.45                     | 0.76                                             | 0.72                                         | 0.75                                          | 0.35                                              | 0.58                                                              |
| Asthma                           | 1 (1)             | 0                  | 1 (2.8)                                     | 0                                      | 0.45                     | 0.48                                             | 0.54                                         | -----                                         | 0.22                                              | 0.32                                                              |
| <b>Current medication</b>        |                   |                    |                                             |                                        |                          |                                                  |                                              |                                               |                                                   |                                                                   |
| Any medication                   | 5 (5.4)           | 4 (7.7)            | 4 (11)                                      | 1 (2.9)                                | 0.57                     | 0.25                                             | 0.56                                         | 0.35                                          | 0.58                                              | 0.18                                                              |
| Antihypertension                 | 11 (11.8)         | 7 (13.4)           | 8 (22)                                      | 2 (5.9)                                | 0.77                     | 0.13                                             | 0.32                                         | 0.26                                          | 0.28                                              | 0.05                                                              |
| Antimicrobials                   | 0                 | 0                  | 0                                           | 0                                      | -----                    | -----                                            | -----                                        | ----                                          | -----                                             | ----                                                              |
| NSAIDs†                          | 3 (3.2)           | 2 (3.8)            | 2 (5.5)                                     | 1 (2.9)                                | 0.84                     | 0.53                                             | 0.93                                         | 0.82                                          | 0.70                                              | 0.58                                                              |
| SAIDs‡                           | 2 (2.1)           | 1 (1.9)            | 2 (5.5)                                     | 0                                      | 0.93                     | 0.31                                             | 0.38                                         | 0.41                                          | 0.35                                              | 0.16                                                              |
| Hormone reposition               | 4 (4.3)           | 2 (3.8)            | 2 (5.5)                                     | 1 (2.9)                                | 0.89                     | 0.76                                             | 0.72                                         | 0.82                                          | 0.70                                              | 0.58                                                              |
| Antidepressant                   | 4 (4.3)           | 3 (5.7)            | 1 (2.8)                                     | 1 (2.9)                                | 0.69                     | 0.68                                             | 0.72                                         | 0.54                                          | 0.50                                              | 0.96                                                              |
| <b>Clinical measurements</b>     |                   |                    |                                             |                                        |                          |                                                  |                                              |                                               |                                                   |                                                                   |
| Edentulism                       | 12 (12.9)         | 13 (25)            | 12 (33.3)                                   | 4 (11.8)                               | 0.06                     | 0.007                                            | 0.86                                         | 0.13                                          | 0.39                                              | 0.03                                                              |
| Caries Experience (DMFT*)        | 17.72±8.11        | 24.8±6.38          | 24.16±7.97                                  | 20.58±8.03                             | 0.0001                   | 0.0001                                           | 0.4                                          | 0.07                                          | 1.0                                               | 0.3                                                               |
| Dental anomalies                 | 3 (3.2)           | 0                  | 0                                           | 0                                      | 0.3                      | 0.27                                             | 0.218                                        | -----                                         | ----                                              | ----                                                              |
| Dental agenesis                  | 3 (3.2)           | 0                  | 0                                           | 2 (5.9)                                | 0.3                      | 0.27                                             | 0.28                                         | 0.08                                          | -----                                             | 0.13                                                              |
| <b>Periodontal phenotype</b>     |                   |                    |                                             |                                        |                          |                                                  |                                              |                                               |                                                   |                                                                   |
| Thin#                            | 12 (12.9)         | 29 (55.7)          | 17 (47.2)                                   | 14 (41.2)                              | 0.000001                 | 0.00002                                          | 0.0004                                       | 0.18                                          | 0.42                                              | 0.61                                                              |
| Thick                            | 81 (87.1)         | 23 (44.3)          | 19 (52.8)                                   | 20 (58.8)                              |                          |                                                  |                                              |                                               |                                                   |                                                                   |

Diseased= chronic periodontitis + peri-implantitis; # Chi-squared test; † Non-steroidal anti-inflammatory drugs; ‡ Steroidal anti-inflammatory drugs; \*DMFT= Decayed, Missing due to caries, Filled Teeth; #presence of apertures in the subjacent bone and friable gingiva.
