# Supplementary material for: Different contribution of BRINP3 gene in chronic periodontitis and peri-implantitis: a cross-sectional study
Source: Springer Nature journal article supplement (doi:10.1186/s12903-015-0018-6), 2015-03-10
Supplement: MOESM2 [file 9754084]

Additional File 2. Clinical findings and anamnesis data of the replication sample.

|                           | Successfully Dental Implant<br>Treated Controls (n=185) |              | Dental Implant Loss<br>Cases (n=92) |              | p-value |
|---------------------------|---------------------------------------------------------|--------------|-------------------------------------|--------------|---------|
|                           | n                                                       | %            | n                                   | %            |         |
| Social Profile            |                                                         |              |                                     |              |         |
| A1/A2/B1                  | 95                                                      | 51.35        | 46                                  | 50           | 0.9*    |
| B2/C/D                    | 90                                                      | 48.65        | 46                                  | 50           |         |
| Medical treatment         |                                                         |              |                                     |              |         |
| Yes                       | 75                                                      | 40.54        | 50                                  | 54.35        | 0.04*   |
| No                        | 110                                                     | 59.46        | 42                                  | 45.65        |         |
| General medical condition |                                                         |              |                                     |              |         |
| Systemic disease          | 127                                                     | 64.65        | 68                                  | 73.91        | 0.4*    |
| Diabetes                  | 09                                                      | 4.86         | 02                                  | 2.17         | 0.34*   |
| Rheumatoid diseases       | 34                                                      | 18.38        | 25                                  | 27.17        | 0.12*   |
| Osteoporosis              | 03                                                      | 1.62         | 02                                  | 2.17         | 0.99*   |
| High blood pressure       | 35                                                      | 18.92        | 24                                  | 26.09        | 0.21*   |
| Cardiovascular diseases   | 10                                                      | 5.4          | 08                                  | 8.7          | 0.31*   |
| Hypotireoidism            | 18                                                      | 9.73         | 10                                  | 10.87        | 0.83*   |
| Current medication        |                                                         |              |                                     |              |         |
| Any medication            | 46                                                      | 24.86        | 17                                  | 18.48        | 0.29*   |
| Antihypertension          | 30                                                      | 16.22        | 21                                  | 22.83        | 0.19*   |
| Antimicrobials            | 15                                                      | 8.11         | 07                                  | 7.61         | 1.0*    |
| NSAID†                    | 06                                                      | 3.24         | 06                                  | 6.52         | 0.22*   |
| SAID‡                     | 04                                                      | 2.16         | 03                                  | 3.26         | 0.69*   |
| Hormone reposition        | 33                                                      | 17.84        | 12                                  | 13.04        | 0.39*   |
| Brushing daily            |                                                         |              |                                     |              |         |
| One time                  | 09                                                      | 4.86         | 06                                  | 6.52         | 0.71§   |
| Two times                 | 42                                                      | 22.7         | 16                                  | 17.39        |         |
| Three times               | 110                                                     | 59.46        | 56                                  | 60.87        |         |
| More than three times     | 24                                                      | 12.97        | 14                                  | 15.22        |         |
| Dental floss daily        |                                                         |              |                                     |              |         |
| Yes                       | 122                                                     | 65.95        | 61                                  | 66.3         | 0.34§   |
| No                        | 37                                                      | 20           | 23                                  | 25           |         |
| Infrequent                | 26                                                      | 14.05        | 08                                  | 8.7          |         |
| Mouth washing daily       |                                                         |              |                                     |              |         |
| Yes                       | 60                                                      | 42.43        | 29                                  | 31.52        | 0.77§   |
| No                        | 85                                                      | 45.95        | 46                                  | 50           |         |
| Infrequent                | 40                                                      | 21.62        | 17                                  | 18.48        |         |
| Clinical appointments ¶   |                                                         | 6.42 ± 4.94  |                                     | 6.28 ± 4.59  | 0.85    |
| Clinical measurements     |                                                         |              |                                     |              |         |
| Edentulism                | 34                                                      | 18.38        | 07                                  | 7.61         | 0.02*   |
| Present teeth ¶           |                                                         | 16.59 ± 9.76 |                                     | 17.05 ± 8.31 | 0.88    |
| Placed implants ¶         |                                                         | 4.44 ± 3.12  |                                     | 5.82 ± 3.65  | 0.001   |

\*Fisher's exact test; †Non-steroidal anti-inflammatory drugs; ‡Steroidal anti-inflammatory drugs; §Chi-square test; ¶Mean ± standard deviation.
