# Supplementary material for: Different contribution of BRINP3 gene in chronic periodontitis and peri-implantitis: a cross-sectional study
Source: Springer Nature journal article supplement (doi:10.1186/s12903-015-0018-6), 2015-03-10
Supplement: MOESM3 [file 9754084]

Additional File 3. Multinomial logistic regression results for the diseased groups of the discovery samples (reference = healthy individuals).

| Groups                                                  | <i>BRINP3</i><br>rs1342913 |             |             |     | <i>BRINP3</i><br>rs1935881 |              | Age          | Sex         | Ethnic<br>Group | Smoking      | Alcohol     |
|---------------------------------------------------------|----------------------------|-------------|-------------|-----|----------------------------|--------------|--------------|-------------|-----------------|--------------|-------------|
|                                                         | AA                         | AG          | GG          | CC  | CT                         | TT           |              |             |                 |              |             |
| Diseased                                                |                            |             |             |     |                            |              |              |             |                 |              |             |
| p-value                                                 | 1.0                        | 0.19        | 0.84        | 1.0 | 0.61                       | 0.32         | 0.00001      | 0.14        | 0.85            | 0.14         | 0.92        |
| Odds                                                    | 1.0                        | 1.86        | 1.09        | 1.0 | 1.01                       | 1.81         | 3.6          | 0.53        | 0.88            | 2.63         | 1.04        |
| Ratio<br>(95%<br>Confidence<br>Interval)                |                            | (0.75-4.58) | (0.37-3.25) |     | (0.44-2.3)                 | (0.46-7.12)  | (0.90-10.7)  | (0.23-1.23) | (0.24-3.18)     | (0.71-9.64)  | (0.47-2.30) |
| Chronic<br>Periodontitis<br>Only                        |                            |             |             |     |                            |              |              |             |                 |              |             |
| p-value                                                 | 1.0                        | 0.45        | 0.16        | 1.0 | 0.39                       | 0.11         | 0.002        | 0.39        | 0.11            | 0.03         | 0.33        |
| Odds                                                    | 1.0                        | 1.7         | 0.39        | 1.0 | 0.88                       | 3.0          | 3.0          | 0.66        | 1.2             | 4.45         | 0.63        |
| Ratio<br>(95%<br>Confidence<br>Interval)                |                            | (0.64-4.48) | (0.09-1.57) |     | (0.26-1.82)                | (0.74-12.11) | (0.80-10.52) | (0.26-1.69) | (0.67-2.19)     | (1.12-17.61) | (0.25-1.59) |
| Peri-<br>Implantitis<br>Only                            |                            |             |             |     |                            |              |              |             |                 |              |             |
| p-value                                                 | 1.0                        | 0.5         | 0.49        | 1.0 | 0.41                       | 0.98         | 0.14         | 0.76        | 0.7             | 0.57         | 0.29        |
| Odds                                                    | 1.0                        | 1.34        | 1.38        | 1.0 | 0.7                        | 8.24         | 1.03         | 0.87        | 1.26            | 0.52         | 0.61        |
| Ratio<br>(95%<br>Confidence<br>Interval)                |                            | (0.47-3.76) | (0.43-4.4)  |     | (0.26-1.59)                | (0-22.3)     | (0.99-1.07)  | (0.34-2.17) | (0.37-4.25)     | (0.05-4.89)  | (0.24-1.52) |
| Diseased= chronic periodontitis + peri-implant disease. |                            |             |             |     |                            |              |              |             |                 |              |             |
