# Supplementary material for: Different contribution of BRINP3 gene in chronic periodontitis and peri-implantitis: a cross-sectional study
Source: Springer Nature journal article supplement (doi:10.1186/s12903-015-0018-6), 2015-03-10
Supplement: MOESM4 [file 9754084]

Additional File 4. Summary of the results of the association between peri-implantitis and *BRINP3* in the replication sample.

| Genotypes | <i>BRINP3</i> rs1342913                |                                              | <i>BRINP3</i> rs1935881                |                                              |
|-----------|----------------------------------------|----------------------------------------------|----------------------------------------|----------------------------------------------|
|           | Peri-implantitis Group (n=92)<br>n (%) | Healthy Peri-implant Tissue (n=185)<br>n (%) | Peri-implantitis Group (n=92)<br>n (%) | Healthy Peri-implant Tissue (n=185)<br>n (%) |
|           | All Losses (n=92)                      | Controls                                     | All Losses (n=92)                      | Controls                                     |
| AA        | 22 (25.0)                              | 53 (29.0)                                    | 7 (8.1)                                | 14 (7.7)                                     |
| AB        | 49 (55.7)                              | 74 (40.4)                                    | 35 (40.7)                              | 85 (47.0)                                    |
| BB        | 17 (19.3)                              | 56 (30.6)                                    | 44 (51.2)                              | 82 (45.3)                                    |
| p-value   | 0.045                                  |                                              | 0.62                                   |                                              |
|           | Single Losses (n=69)                   | Controls                                     | Single Losses (n=69)                   | Controls                                     |
| AA        | 13 (23.6)                              | 53 (29.0)                                    | 6 (11.1)                               | 14 (7.7)                                     |
| AB        | 33 (60.0)                              | 74 (40.4)                                    | 23 (42.6)                              | 85 (47.0)                                    |
| BB        | 9 (16.4)                               | 56 (30.6)                                    | 25 (46.3)                              | 82 (45.3)                                    |
| p-value   | 0.027                                  |                                              | 0.69                                   |                                              |
|           | Multiple Losses (n=23)                 | Controls                                     | Multiple Losses (n=23)                 | Controls                                     |
| AA        | 9 (27.3)                               | 53 (29.0)                                    | 1 (3.1)                                | 14 (7.7)                                     |
| AB        | 16 (48.5)                              | 74 (40.4)                                    | 12 (37.5)                              | 85 (47.0)                                    |
| BB        | 8 (24.2)                               | 56 (30.6)                                    | 19 (59.4)                              | 82 (45.3)                                    |
| p-value   | 0.65                                   |                                              | 0.29                                   |                                              |

Note: Differences in the total number of genotypes and the total sample are due to PCR failure.
